# Supplementary material
Source: MDPI journal article supplement (https://www.mdpi.com/2311-7524/10/3/262)
Supplement: s1 [file s1 › horticulturae-2888630-supplementary.pdf]

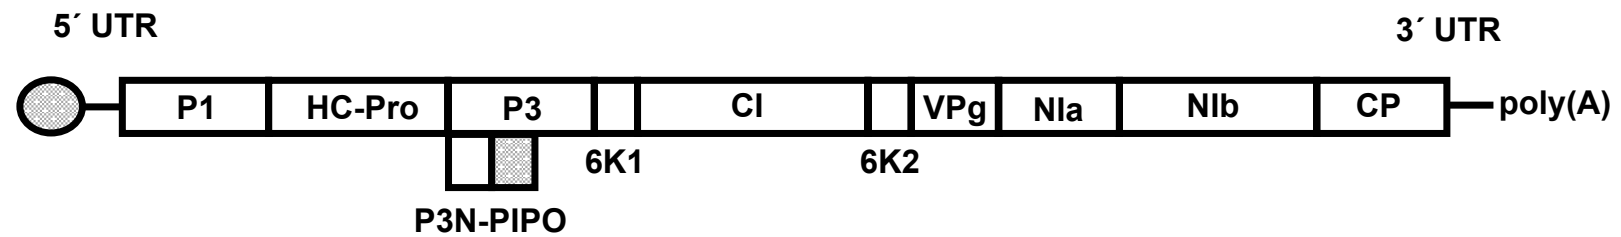

**Supplementary Figure 1.** Schematic representation of the BYMV genome.

Large open reading frame (ORF) is represented by a rectangular box divided into viral products. Second PIPO ORF is indicated by a grey box below the P3 region. UTR – untranslated region. The grey circle represents covalently bound VPg.
